# Supplementary material
Source: publisher figshare collection journal article supplement (https://gsapubs.figshare.com/ndownloader/files/23305511)
Supplement: Supplementary file 1 [file 23305511]

## Sheet: Sheet1
Filename	δ34SVCDT	std err	Site	Spot	Phase	Slide
T095_389@1.asc	15.7271	0.0801204	5	1	Pe	T095-389
T095_389@2.asc	-4.78985	0.0704221	5	2	Pn	T095-389
T095_389@3.asc	-3.5589	0.0773905	5	3	Pn	T095-389
T095_389@4.asc	-5.97816	0.117343	5	4	Pn	T095-389
T095_389@5.asc	-3.34474	0.0785182	5	5	Pn	T095-389
T095_389@6.asc	-2.82898	0.067489	5	6	Pn	T095-389
T095_389@7.asc	15.208	0.0858816	5	7	Pe	T095-389
T095_389@8.asc	-18.3756	0.161463	5	8	Pn	T095-389
T095_389@9.asc	-12.8533	0.112198	5	9	Pn	T095-389
T095_389@10.asc	-15.0279	0.0695957	5	10	Pn	T095-389
T095_389@12.asc	17.1573	0.0782959	5	12	Pe	T095-389
T095_389@13.asc	-4.80377	0.115213	5	13	Pn	T095-389
T095_389@14.asc	-3.15682	0.10565	5	14	Pn	T095-389
T095_389@15.asc	-5.30056	0.0834231	5	15	Pn	T095-389
T095_389@17.asc	-5.55957	0.0629495	5	17	Pn	T095-389
T095_389@18.asc	-2.17395	0.0850782	5	18	Pn	T095-389
T095_389@19.asc	-4.89502	0.0584571	5	19	Pn	T095-389
T095_389@20.asc	-3.37928	0.0858289	5	20	Pn	T095-389
T095_389@21.asc	-4.76109	0.125992	5	21	Pn	T095-389
T095_389@22.asc	-2.11655	0.10288	5	22	Pn	T095-389
T095_389@23.asc	-0.670914	0.0653102	5	23	Pn	T095-389
T095_389@24.asc	-3.88748	0.0671458	5	24	Pn	T095-389
T095_389@25.asc	-2.47042	0.060014	5	25	Pn	T095-389
T095_389@26.asc	-1.48533	0.0877715	5	26	Pn	T095-389
T095_389@27.asc	10.4623	32.2625	7	27	Pn	T095-389	low counts
T095_389@28.asc	1.3919	0.116146	7	28	Pn	T095-389
T095_389@29.asc	19.3451	5.86839	7	29	Pn	T095-389	low counts
T095_389@30.asc	-7.6708	0.135556	7	30	Pn	T095-389
T095_389@31.asc	-8.12677	0.142782	7	31	Pn	T095-389
T095_389@32.asc	-11.6438	0.130079	8	32	Pi	T095-389
T095_389@33.asc	-12.6093	0.12508	8	33	Pn	T095-389
T095_389@34.asc	-10.2027	0.122064	8	34	Pn	T095-389
T095_389@35.asc	-4.28749	0.146801	8	35	Pn	T095-389
T095_389@36.asc	-2.97786	0.127851	8	36	Pn	T095-389
T095_389@37.asc	-3.93886	0.125491	8	37	Pn	T095-389
T095_389@38.asc	-4.93843	0.130075	8	38	Pn	T095-389
T095_389@39.asc	-2.31095	0.147297	8	39	Pn	T095-389
T095_389@40.asc	-12.6206	1.01547	8	40	Pn	T095-389	low counts
T095_389@41.asc	1.68368	0.14769	8	41	Pn	T095-389
T095_389@42.asc	-0.311448	0.0759557	8	42	Pn	T095-389
T095_389@43.asc	-8.8744	0.092308	8	43	Pn	T095-389
T095_389@44.asc	-7.24163	0.0825687	8	44	Pn	T095-389
T095_389@45.asc	-8.87358	0.136074	8	45	Pn	T095-389
T095_389@46.asc	-9.21255	0.0933948	9	46	Pn	T095-389
T095_389@47.asc	-6.64198	0.312642	9	47	Pn	T095-389
T095_389@48.asc	-7.25056	0.687716	9	48	Pn	T095-389
T095_389@49.asc	-5.49148	0.430109	9	49	Pn	T095-389
T095_389@50.asc	-9.25081	0.0961332	9	50	Pn	T095-389
T095_389@51.asc	-8.46047	0.0791685	9	51	Pn	T095-389
T095_389@52.asc	-8.98675	0.721369	9	52	Pn	T095-389
T095_389@53.asc	-5.03094	0.0960056	9	53	Pn	T095-389
T095_389@54.asc	-6.46589	0.036477	9	54	Pn	T095-389
T095_389@55.asc	-6.50063	0.0675832	9	55	Pn	T095-389
T095_389@56.asc	-7.53316	0.609991	9	56	Pn	T095-389
T095_389@57.asc	-6.0074	0.0419131	9	57	Pn	T095-389
T095_389@58.asc	-6.87059	0.063409	9	58	Pn	T095-389
T095_389@59.asc	-8.059	0.175234	9	59	Pn	T095-389
T095_389@60.asc	-4.64692	0.0840833	9	60	Pn	T095-389
T095_389@61.asc	-5.50159	0.0928731	9	61	Pn	T095-389
T095_389@62.asc	-7.0762	0.0737489	9	62	Pn	T095-389
T095_389@63.asc	-5.21519	0.0946434	9	63	Pn	T095-389
T095_389@64.asc	-4.96487	0.099623	9	64	Pn	T095-389
T095_389@65.asc	-5.51833	0.0404892	9	65	Pn	T095-389
T095_389@66.asc	-6.39948	0.0801093	9	66	Pn	T095-389
T095_389@67.asc	-10.0411	0.135043	9	67	Pn	T095-389
Site8_0729@1.asc	-7.08564	0.295348	8	1	G	T029-56
Site8_0729@2.asc	-8.30229	0.362799	8	2	G	T029-56
Site8_0729@3.asc	-5.70444	0.232983	8	3	G	T029-56
Site8_0729@4.asc	-5.44941	0.231302	8	4	G	T029-56
Site8_0729@5.asc	6.3302	0.205965	8	5	Pe	T029-56
Site8_0729@6.asc	6.6751	0.205191	8	6	Pe	T029-56
Site8_0729@7.asc	6.66779	0.213965	8	7	Pe	T029-56
Site8_0729@8.asc	6.79073	0.204524	8	8	Pe	T029-56
Site8_0729@9.asc	11.2492	0.258311	8	9	Pm	T029-56
Site8_0729@10.asc	6.87766	0.205798	8	10	Pm	T029-56
Site8_0729@11.asc	2.05813	0.210429	8	11	Pm	T029-56
Site8_0729@12.asc	-1.182	0.208607	8	12	Pm	T029-56
Site8_0729@13.asc	3.42634	0.226959	8	13	Cpy	T029-56
Site8_0729@14.asc	-6.0439	0.238309	8	14	G	T029-56
Site9_0729@15.asc	7.43925	0.11717	9	15	Pm	T029-56
Site9_0729@16.asc	3.15181	0.148972	9	16	Cpy	T029-56
Site9_0729@17.asc	27.0481	0.117981	9	17	Pm	T029-56
Site9_0729@18.asc	4.25485	0.151711	9	18	Cpy	T029-56
Site9_0729@19.asc	2.78973	0.166134	9	19	Cpy	T029-56
Site9_0729@20.asc	5.91337	0.189549	9	20	Cpy	T029-56
Site9_0729@21.asc	13.1396	0.234089	9	21	Pm	T029-56
Site9_0729@22.asc	5.27982	0.247227	9	22	Pm	T029-56
Site9_0729@23.asc	20.8103	0.183069	9	23	Pm	T029-56
Site9_0729@24.asc	6.08151	0.145446	9	24	Pi	T029-56
Site13_0729@25.asc	-2.92662	0.225984	13	25	Pe	T029-56
Site13_0729@26.asc	0.605363	0.110287	13	26	Pe	T029-56
Site13_0729@27.asc	2.31573	0.107332	13	27	Pe	T029-56
Site13_0729@28.asc	5.92354	0.111225	13	28	Pe	T029-56
Site13_0729@29.asc	-2.01693	0.126864	13	29	Pe	T029-56
Site13_0729@30.asc	-9.62683	0.286547	13	30	Ge	T029-56
Site13_0729@31.asc	-9.05838	0.359829	13	31	Ge	T029-56
Site13_0729@32.asc	8.86385	0.133586	13	32	Pe	T029-56
Site13_0729@33.asc	9.10415	0.202888	13	33	Pm	T029-56
Site13_0729@34.asc	17.2154	0.138128	13	34	Pm	T029-56
Site13_0729@36.asc	7.5132	0.327072	13	36	Pi	T029-56
Site13_0729@37.asc	7.27226	0.223234	13	37	Pi	T029-56
Site13_0729@38.asc	16.8708	0.372084	13	38	Pm	T029-56
Site13_0729@39.asc	1.38129	0.221301	13	39	Pe	T029-56
Site13_0729@40.asc	-0.873546	0.234175	13	40	Pe	T029-56
Site13_0729@41.asc	23.4788	0.259769	13	41	Pm	T029-56
Site13_0729@42.asc	-20.1638	0.300161	13	42	Pm	T029-56
Site13_0729@43.asc	5.59357	0.257384	13	43	Pi	T029-56
Site13_0729@44.asc	5.47548	0.262283	13	44	Pi	T029-56
Site8_0729@45.asc	17.1501	0.277891	8	45	Pm	T029-56
Site8_0729@46.asc	5.49947	0.318112	8	46	Pi	T029-56
Site8_0729@47.asc	2.75384	0.319553	8	47	Pi	T029-56
Site8_0729@48.asc	4.11484	0.291353	8	48	Pi	T029-56
Site8_0729@49.asc	1.36041	0.284658	8	49	Pm	T029-56
Site8_0729@50.asc	4.88895	0.297489	8	50	Pm	T029-56
Site8_0729@51.asc	-0.318299	0.272932	8	51	Pm	T029-56
Site8_0729@52.asc	25.7935	0.303805	8	52	Pc	T029-56
Site8_0729@53.asc	16.3533	0.315048	8	53	Pc	T029-56
Site8_0729@54.asc	30.1007	0.3347	8	54	Pm	T029-56
Site8_0729@55.asc	26.5641	0.335876	8	55	Pm	T029-56
Site8_0729@56.asc	27.489	0.388101	8	56	Pm	T029-56
Site8_0729@57.asc	8.11286	0.315681	8	57	Pm	T029-56
Site8_0729@58.asc	6.69216	0.269638	8	58	Pm	T029-56
Site8_0729@59.asc	18.3395	0.329354	8	59	Pm	T029-56
Site8_0729@60.asc	-7.87467	0.319597	8	60	G	T029-56
Site8_0729@61.asc	19.0273	0.421993	8	61	Pm	T029-56
Site8_0729@62.asc	19.7236	0.309548	8	62	Pm	T029-56
Site8_0729@63.asc	17.6711	0.337455	8	63	Pm	T029-56
Site8_0729@64.asc	-8.45628	0.264662	8	64	Pm	T029-56
Site8_0729@65.asc	7.47583	0.224038	8	65	Pi	T029-56
Site8_0729@66.asc	3.21124	0.235615	8	66	Pi	T029-56
Site8_0729@67.asc	6.64802	0.218243	8	67	Pi	T029-56
Site8_0729@68.asc	7.04693	0.29336	8	68	Pi	T029-56
Site8_0729@69.asc	-4.30137	0.717631	8	69	Pi	T029-56
Site8_0729@70.asc	4.81383	0.210885	8	70	Pi	T029-56
Site8_0729@71.asc	10.3294	0.222651	8	71	Pi	T029-56
Site8_0729@72.asc	1.12203	0.226501	8	72	Pi	T029-56
Site8_0729@73.asc	0.334269	0.255272	8	73	Pi	T029-56
Site8_0729@74.asc	4.72577	0.262665	8	74	Pi	T029-56
Site8_0729@75.asc	-2.07702	0.21948	8	75	Pm	T029-56
Site8_0729@76.asc	3.39912	0.234877	8	76	Pm	T029-56
Site8_0729@77.asc	29.6709	0.218284	8	77	Pm	T029-56
Site8_0729@78.asc	0.535285	0.273577	8	78	Pm	T029-56
Site8_0729@79.asc	23.6218	0.236219	8	79	Pm	T029-56
Site8_0729@80.asc	1.00955	0.245233	8	80	Pm	T029-56
Site8_0729@81.asc	13.5555	0.238392	8	81	Pm	T029-56
Site8_0729@82.asc	19.7444	0.248651	8	82	Pm	T029-56
Site8_0729@83.asc	4.82313	0.291388	8	83	Pm	T029-56
Site8_0729@84.asc	6.80357	0.211712	8	84	Pi	T029-56
Site14_0730@85.asc	7.61912	0.115413	14	85	Pi	T029-56
Site14_0730@86.asc	6.15652	0.134212	14	86	Pi	T029-56
Site14_0730@87.asc	9.41038	0.162644	14	87	Pi	T029-56
Site14_0730@88.asc	2.30423	0.118917	14	88	Pm	T029-56
Site14_0730@89.asc	0.925994	0.152017	14	89	Pm	T029-56
Site14_0730@90.asc	2.50873	0.188301	14	90	Pm	T029-56
Site14_0730@91.asc	1.59908	0.158459	14	91	Pm	T029-56
Site14_0730@92.asc	-1.13688	0.153921	14	92	Pm	T029-56
Site14_0730@93.asc	-0.238366	0.140636	14	93	Pm	T029-56
Site14_0730@94.asc	-1.5776	0.125227	14	94	Pm	T029-56
Site14_0730@95.asc	-0.989754	0.13654	14	95	Pm	T029-56
Site14_0730@96.asc	4.49318	0.142237	14	96	Pm	T029-56
Site14_0730@97.asc	8.30903	0.123273	14	97	Pc	T029-56
Site14_0730@98.asc	6.70426	0.124143	14	98	Pc	T029-56
Site14_0730@99.asc	11.2308	0.315608	14	99	Pc	T029-56
Site14_0730@100.asc	5.50551	0.119023	14	100	Pe	T029-56
Site14_0730@101.asc	6.1573	0.128469	14	101	Pe	T029-56
Site14_0730@102.asc	12.3897	0.164091	14	102	Pc	T029-56
Site14_0730@103.asc	5.65914	0.115324	14	103	Pe	T029-56
Site14_0730@104.asc	-1.41789	0.113712	14	104	Pm	T029-56
Site14_0730@105.asc	12.523	0.172745	14	105	Pm	T029-56
Site14_0730@106.asc	1.03474	0.179851	14	106	Pm	T029-56
Site14_0730@107.asc	17.576	0.208526	14	107	Pm	T029-56
Site14_0730@108.asc	-0.452468	0.17178	14	108	Pm	T029-56
Site14_0730@109.asc	11.2057	1.2008	14	109	DkGr	T029-56
Site14_0730@110.asc	13.8763	1.35833	14	110	DkGr	T029-56
Site14_0730@111.asc	8.27272	0.169514	14	111	Pi	T029-56
Site14_0730@112.asc	7.90217	0.164419	14	112	Pi	T029-56
Site14_0730@113.asc	7.11006	0.184742	14	113	Pi	T029-56
Site14_0730@114.asc	9.05032	0.166564	14	114	Pi	T029-56
Site14_0730@115.asc	15.7087	0.289783	14	115	DkGr	T029-56
Site14_0730@116.asc	6.51965	0.169508	14	116	Pi	T029-56
Site14_0730@117.asc	13.4399	1.03585	14	117	DkGr	T029-56
Site14_0730@118.asc	18.1501	0.88371	14	118	DkGr	T029-56
Site14_0730@119.asc	10.0566	0.190533	14	119	Pi	T029-56
Site14_0730@120.asc	7.24523	0.262693	14	120	Pi	T029-56
Site14_0730@121.asc	15.9673	0.205029	14	121	Pm	T029-56
Site14_0730@122.asc	7.44698	0.175422	14	122	Pi	T029-56
Site14_0730@123.asc	7.93373	0.200335	14	123	Pi	T029-56
Site14_0730@124.asc	5.72608	0.164273	14	124	Pe	T029-56
Site6_0730@125.asc	4.06698	0.155182	6	125	Pe	T029-56
Site6_0730@126.asc	4.28482	0.150419	6	126	Pe	T029-56
Site6_0730@127.asc	-12.978	0.270511	6	127	Cov	T029-56
Site6_0730@128.asc	1.41473	0.146303	6	128	Pe	T029-56
Site6_0730@129.asc	2.39075	0.142237	6	129	Pe	T029-56
Site6_0730@130.asc	5.67951	0.192691	6	130	Pe	T029-56
Site6_0730@131.asc	-0.950141	0.163386	6	131	Pe	T029-56
Site6_0730@132.asc	-0.245487	0.224026	6	132	Pe	T029-56
Site6_0730@133.asc	-1.22256	0.279997	6	133	Pm	T029-56
Site6_0730@134.asc	7.99879	0.150996	6	134	Pm	T029-56
Site6_0730@135.asc	13.5959	0.21638	6	135	hit qtz	T029-56
Site6_0730@136.asc	7.29105	0.0993901	6	136	Pi	T029-56
Site6_0730@137.asc	9.36613	0.0823269	6	137	Pi	T029-56
Site6_0730@138.asc	6.76633	0.148908	6	138	Pi	T029-56
Site6_0730@139.asc	4.9558	0.0955175	6	139	Pm	T029-56
Site6_0730@140.asc	7.5662	0.0784937	6	140	Pm	T029-56
Site6_0730@141.asc	1.09697	0.123859	6	141	Pe	T029-56
Site6_0730@142.asc	8.43599	0.101583	6	142	Pm	T029-56
Site6_0730@143.asc	10.4046	0.296077	6	143	Pm	T029-56
Site6_0730@144.asc	8.05269	0.108654	6	144	Pe	T029-56
Site1_0730@145.asc	41.1209	0.143234	1	145	Pm	T029-56
Site1_0730@146.asc	9.61971	0.116027	1	146	Pm	T029-56
Site1_0730@147.asc	11.5692	0.141174	1	147	Pm	T029-56
Site1_0730@148.asc	22.6322	0.0984658	1	148	Pm	T029-56
Site1_0730@149.asc	3.23443	0.0998588	1	149	Pm	T029-56
Site1_0730@150.asc	9.48506	0.110804	1	150	Pc	T029-56
Site1_0730@151.asc	8.17342	0.104936	1	151	Pc	T029-56
Site1_0730@152.asc	11.5043	0.212507	1	152	Pc	T029-56
Site1_0730@153.asc	8.39614	0.104743	1	153	Pc	T029-56
Site1_0730@154.asc	21.5515	0.110753	1	154	Pm	T029-56
Site1_0730@155.asc	8.68453	0.0946882	1	155	Pm	T029-56
Site1_0730@156.asc	7.24553	0.13188	1	156	Pc	T029-56
Site1_0730@157.asc	6.90721	0.0930875	1	157	Pi	T029-56
Site1_0730@158.asc	-1.7774	0.178881	1	158	Pc	T029-56
Site1_0730@159.asc	5.77856	0.106686	1	159	Pc	T029-56
Site1_0730@160.asc	5.43136	0.134307	1	160	Pi	T029-56
Site1_0730@161.asc	5.27795	0.0903721	1	161	Pc	T029-56
Site1_0730@162.asc	7.39098	0.101929	1	162	Pc	T029-56
Site1_0730@163.asc	33.8188	0.137939	1	163	Pm	T029-56
Site1_0730@164.asc	9.19475	0.0933977	1	164	Pc	T029-56
Site3_0731@165.asc	10.5271	0.174528	3	165	Pc	T029-56
Site3_0731@166.asc	2.80347	0.190098	3	166	Pc	T029-56
Site3_0731@167.asc	2.82475	0.17199	3	167	Pc	T029-56
Site3_0731@168.asc	6.05812	0.185104	3	168	Pc	T029-56
Site3_0731@169.asc	8.42661	0.162639	3	169	Pc	T029-56
Site3_0731@170.asc	13.386	0.165492	3	170	Pc	T029-56
Site3_0731@171.asc	43.6495	0.153591	3	171	Pm	T029-56
Site3_0731@172.asc	-3.30833	0.197459	3	172	Pm	T029-56
Site3_0731@173.asc	28.0889	0.15233	3	173	Pm	T029-56
Site3_0731@174.asc	7.62943	0.193602	3	174	Pc	T029-56
Site3_0731@175.asc	9.6847	0.154399	3	175	Pm	T029-56
Site3_0731@176.asc	-2.03544	0.201981	3	176	Pm	T029-56
Site3_0731@177.asc	2.9203	0.146749	3	177	Pc	T029-56
Site3_0731@178.asc	0.863239	0.158352	3	178	Pm	T029-56
Site3_0731@179.asc	10.2643	0.157179	3	179	Pc	T029-56
Site3_0731@180.asc	6.13808	0.199838	3	180	Pi	T029-56
Site3_0731@181.asc	0.304907	0.280755	3	181	Pm	T029-56
Site3_0731@182.asc	-1.58163	0.154142	3	182	Pm	T029-56
Site3_0731@183.asc	4.82763	0.162126	3	183	Pi	T029-56
Site3_0731@184.asc	13.9136	0.149994	3	184	Pc	T029-56
Site3_0731@185.asc	4.03741	0.120502	3	185	Pm	T029-56
Site3_0731@186.asc	-5.82696	0.146248	3	186	Pm	T029-56
Site3_0731@187.asc	3.94643	0.115767	3	187	Pi	T029-56
Site3_0731@188.asc	3.52161	0.162242	3	188	Pi	T029-56
Site3_0731@189.asc	5.65389	0.128236	3	189	Pi	T029-56
Site3_0731@190.asc	-4.52906	0.109284	3	190	Pm	T029-56
Site3_0731@191.asc	-3.09062	0.101384	3	191	Pm	T029-56
Site3_0731@192.asc	6.48344	0.229569	3	192	Pc	T029-56
Site3_0731@193.asc	-1.55817	0.0878216	3	193	Pm	T029-56
Site3_0731@194.asc	-0.993838	0.173971	3	194	Pm	T029-56
Site3_0731@195.asc	0.211483	0.0983596	3	195	Pm	T029-56
Site3_0731@196.asc	9.74308	0.108014	3	196	Pc	T029-56
Site3_0731@197.asc	1.21363	0.118805	3	197	Pm	T029-56
Site3_0731@198.asc	29.5109	0.109645	3	198	Pm	T029-56
Site3_0731@199.asc	37.2682	0.120106	3	199	Pm	T029-56
Site3_0731@200.asc	1.35253	0.110032	3	200	Pm	T029-56
Site3_0731@201.asc	1.8983	0.0941914	3	201	Pc	T029-56
Site3_0731@202.asc	-3.82297	1.599	3	202	Pc	T029-56
Site3_0731@203.asc	7.32887	0.0989897	3	203	Pc	T029-56
Site3_0731@204.asc	9.82318	0.20515	3	204	Pc	T029-56
T029-56@11.asc	-2.13651	0.173138	1	-11	Tenn	T029-56
T029-56@12.asc	4.03089	0.160259	1	-12	Pm	T029-56
T029-56@13.asc	13.1287	0.218069	1	-13	Pm	T029-56
T029-56@14.asc	27.0167	0.181356	1	-14	Pm	T029-56
T029-56@15.asc	45.2014	0.174234	1	-15	Pm	T029-56
T029-56@16.asc	6.49897	0.15731	1	-16	Pi	T029-56
T029-56@17.asc	7.29689	0.173707	1	-17	Pi	T029-56
T029-56@18.asc	6.79377	0.163443	1	-18	Pi	T029-56
T029-56@19.asc	6.31651	0.158171	1	-19	Pc	T029-56
T029-56@20.asc	7.79488	0.217755	1	-20	Pc	T029-56
T029-56@21.asc	6.61241	0.161989	1	-21	Pi	T029-56
T029-56@22.asc	11.9316	0.161083	1	-22	Pc	T029-56
T029-56@23.asc	-12.4773	0.32765	4	-23	Cov	T029-56
T029-56@24.asc	12.491	0.282708	4	-24	Pe	T029-56
T029-56@25.asc	6.39508	0.281673	4	-25	Pe	T029-56
T029-56@26.asc	5.16316	0.281236	4	-26	Pe	T029-56
T029-56@27.asc	8.52695	0.284724	4	-27	Pc	T029-56
T029-56@28.asc	9.15099	0.290277	4	-28	Pc	T029-56
T029-56@29.asc	9.69458	0.322438	4	-29	Pc	T029-56
T029-56@30.asc	10.9384	0.287108	4	-30	Pm	T029-56
T029-56@31.asc	8.68928	0.30297	4	-31	Pm	T029-56
T029-56@32.asc	3.4243	0.282977	4	-32	Pm	T029-56
T029-56@33.asc	0.700306	0.288285	4	-33	Pm	T029-56
T029-56@34.asc	8.26846	0.301948	4	-34	Pc	T029-56
T029-56@35.asc	8.1393	0.261161	3	-35	Pi	T029-56
T029-56@36.asc	7.61307	0.268607	3	-36	Pc	T029-56
T029-56@37.asc	9.93088	0.267876	3	-37	Pc	T029-56
T029-56@38.asc	-1.80084	0.261715	3	-38	Pm	T029-56
T029-56@39.asc	11.4114	0.276378	3	-39	Pc	T029-56
T029-56@40.asc	9.52304	0.284149	3	-40	Pc	T029-56
T029-56@41.asc	27.9502	0.291328	3	-41	Pm	T029-56
T029-56@42.asc	31.6925	0.282019	3	-42	Pm	T029-56
T029-56@43.asc	8.90721	0.283808	3	-43	Pc	T029-56
T029-56@44.asc	8.68445	0.26485	3	-44	Pi	T029-56
T029-56@45.asc	8.75649	0.26748	3	-45	Pc	T029-56
T029-56@46.asc	31.8946	0.273311	3	-46	Pm	T029-56
T029-56@47.asc	3.38348	0.282327	3	-47	Pm	T029-56
T029-56@48.asc	8.69646	0.266917	3	-48	Pc	T029-56
T029-56@49.asc	7.69007	0.259586	3	-49	Pi	T029-56
T029-56@50.asc	7.94721	0.257546	3	-50	Pi	T029-56
T029-56@51.asc	2.31943	0.285248	3	-51	Pi	T029-56
T029-56@52.asc	1.03665	0.262363	3	-52	Pi	T029-56
T029-56@53.asc	8.39435	0.27355	3	-53	Pi	T029-56
T029-56@54.asc	21.9686	0.288414	3	-54	Pc	T029-56
T029-56@55.asc	19.7556	0.275059	3	-55	Pc	T029-56
T029-56@56.asc	34.0574	0.288138	3	-56	Pc	T029-56
T029-56@57.asc	9.90085	0.262761	3	-57	Pi	T029-56
T029-56@58.asc	10.9854	0.258453	3	-58	Pi	T029-56
T029-56@59.asc	16.2864	0.270036	3	-59	Pc	T029-56
T029-56@60.asc	28.8612	0.286758	3	-60	Pc	T029-56
T029-56@61.asc	8.06697	0.130425	3	-61	Pi	T029-56
T029-56@62.asc	7.34023	0.127383	3	-62	Pc	T029-56
T029-56@63.asc	26.9831	0.154631	3	-63	Pc	T029-56
T029-56@64.asc	-1.13155	0.146817	3	-64	Pm	T029-56
T029-56@65.asc	28.4715	0.139845	3	-65	Pc	T029-56
T029-56@66.asc	6.81885	0.136271	3	-66	Pc	T029-56
T029-56@67.asc	6.40876	0.138935	3	-67	Pi	T029-56
T029-56@68.asc	3.84328	0.145157	3	-68	Pi	T029-56
T029-56@69.asc	10.4342	0.15956	3	-69	Pc	T029-56
T029-56@70.asc	11.7268	0.150182	3	-70	Pc	T029-56
T029-56@71.asc	9.43478	0.103306	4	-71	Pe	T029-56
T029-56@72.asc	18.9639	0.122528	4	-72	Pm	T029-56
T029-56@73.asc	16.264	0.105229	4	-73	Pm	T029-56
T029-56@74.asc	2.17034	0.107869	4	-74	Pm	T029-56
T029-56@75.asc	6.08903	0.170185	4	-75	Pc	T029-56
T029-56@76.asc	8.76035	0.104177	4	-76	Pi	T029-56
T029-56@77.asc	6.96145	0.102291	4	-77	Pe	T029-56
T029-56@78.asc	21.199	0.113072	4	-78	Pc	T029-56
T029-56@79.asc	10.0201	0.232985	4	-79	Pm	T029-56
T029-56@80.asc	0.841146	0.100443	4	-80	Pm	T029-56
T029-56@81.asc	5.7849	0.0917067	4	-81	Pm	T029-56
T029-56@82.asc	17.4607	0.122034	4	-82	Pc	T029-56
T029-56@83.asc	7.43243	0.12207	4	-83	Pc	T029-56
T029-56@1.asc	12.0549	0.436361	1	-1	Pi	T029-56
T029-56@2.asc	9.85214	0.409431	1	-2	Pc	T029-56
T029-56@3.asc	9.11531	0.481812	1	-3	Pi	T029-56
T029-56@4.asc	5.36621	0.464463	1	-4	Pi	T029-56
T029-56@5.asc	16.8714	0.446323	1	-5	Pi	T029-56
T029-56@6.asc	17.6448	0.439986	1	-6	Pc	T029-56
T029-56@7.asc	10.873	0.584716	1	-7	Pm	T029-56
T029-56@8.asc	38.6431	0.632155	1	-8	Pm	T029-56
T029-56@9.asc	12.4634	0.428955	1	-9	Pi	T029-56
T029-56@10.asc	9.69803	0.447953	1	-10	Pm	T029-56
